# Supplementary material for: Scalable noninjection phosphine-free synthesis and optical properties of tetragonal-phase CuInSe2quantum dots
Source: Royal Society of Chemistry journal article supplement (doi:10.1039/c6nr02505f), 2016-01-01
Supplement: c6nr02505f1.pdf [file c6nr02505f1.pdf]

## Scalable Noninjection Phosphine-Free Synthesis and Optical Properties of Tetragonal-Phase CuInSe<sub>2</sub> Quantum Dots

Feng Liu,<sup>a</sup> Jun Zhu,<sup>\*a</sup> Yafeng Xu,<sup>a</sup> Li Zhou,<sup>a</sup> and Songyuan Dai<sup>\*b,a</sup>

<sup>a</sup>Key Laboratory of Novel Thin Film Solar Cells, Institute of Applied Technology, Hefei Institutes of Physical Science, Chinese Academy of Sciences, Hefei, 230031, P. R. China

<sup>b</sup>Beijing Key Laboratory of Novel Thin Film Solar Cells, State Key Laboratory of Alternate Electrical Power System with Renewable Energy Sources, North China Electric Power University, Beijing, 102206, P. R. China

### Materials Characterization

The phase identification was carried out using a powder X-ray diffraction (XRD, TTR-III, Rigaku Corp., Japan). The morphology and crystal structure of the prepared samples were characterized using a field emission scanning electron microscopy (FESEM, FEI, Quanta 200FEG) and a high-resolution transmission electron microscopy (HRTEM, JEM-2100F, Japan). Energy dispersive X-ray spectroscopy (EDS) were performed with an energy dispersive spectrometer equipped on the SEM/TEM equipment. X-ray photoelectron spectroscopy (XPS) data were accumulated on an ESCA-LAB250 XPS system (Thermo, U.S.). Inductively coupled plasma atomic emission spectrometry (ICP-AES) was performed on a Perkin-Elmer Optima 3000DV after dissolving the nanocrystals in aqua regia. UV-vis-NIR absorption spectra were obtained with a spectrophotometer (HITACHI, U-3900H, Japan). Current-voltage (*J-V*) characteristics of the solar cells were derived with a Keithley 2420 digital source meter (Keithley, USA) under a 450W xenon lamp (Oriel Sol3A Solar Simulator 94043, Newport Stratford Inc., USA).

### Photovoltaic Device Fabrication

CuInSe QD-sensitized TiO<sub>2</sub> photoanodes were prepared as described in the main text. Solar cell devices were fabricated by sandwiching the photoanode and the CuSe counter electrode (prepared according to our previous report<sup>1</sup>) using a thermal adhesive film (Surlyn, 60 μm, Dupont). The polysulfide electrolyte (2 M S, 2 M Na<sub>2</sub>S, and 0.2 M KCl in ultrapure aqueous solution) was then injected by vacuum backfilling followed by sealing with a Surlyn film and a cover glass. The active surface area of the mask-covered solar cells was measured to be 0.25 cm<sup>2</sup>.

### MPA Ligand Exchange

In our typical ligand exchange route, equal volume of MPA (Alfa Aesar, 99%) was added to the as-synthesized CuInSe QD chloroform solution, followed by sonication for 3 h. Products were then isolated with chloroform, collected by centrifugation and removal of the supernatant. MPA-capped CuInSe QDs thus achieved and can be freely dissolved in methanol. CuInSe<sub>2</sub> QDs can also be dissolvable in water, but we note that the solubility is not so good as in methanol. This is probably because the initial long-chain ligands (e.g.,

DDT) on QD surface still can not be thoroughly replaced by our MPA treatment.

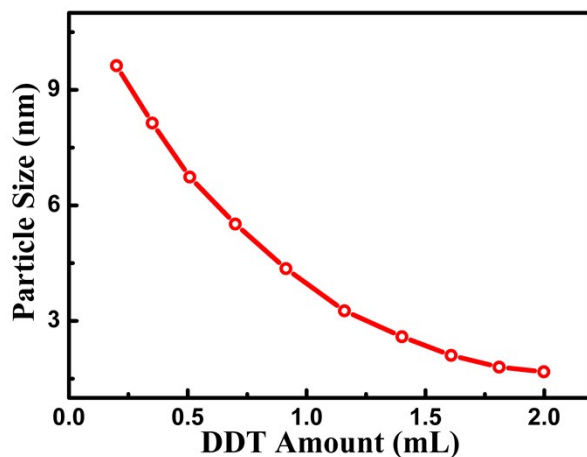

**Figure S1.** Particle size of the resulting CISE QDs as a function of DDT amount.

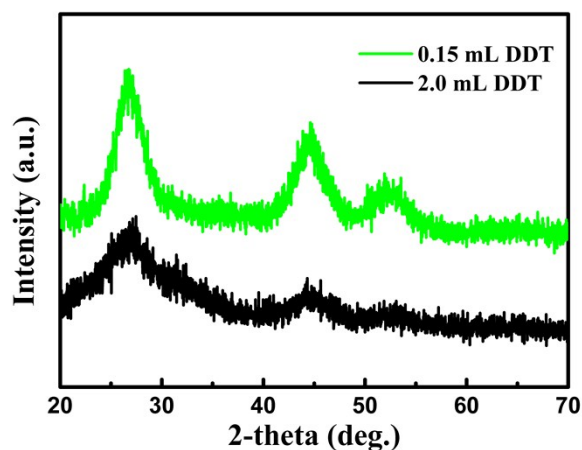

**Figure S2.** XRD spectra of the tetragonal CISE QDs synthesized with addition of 0.15 mL DDT and 2.0 mL DDT.

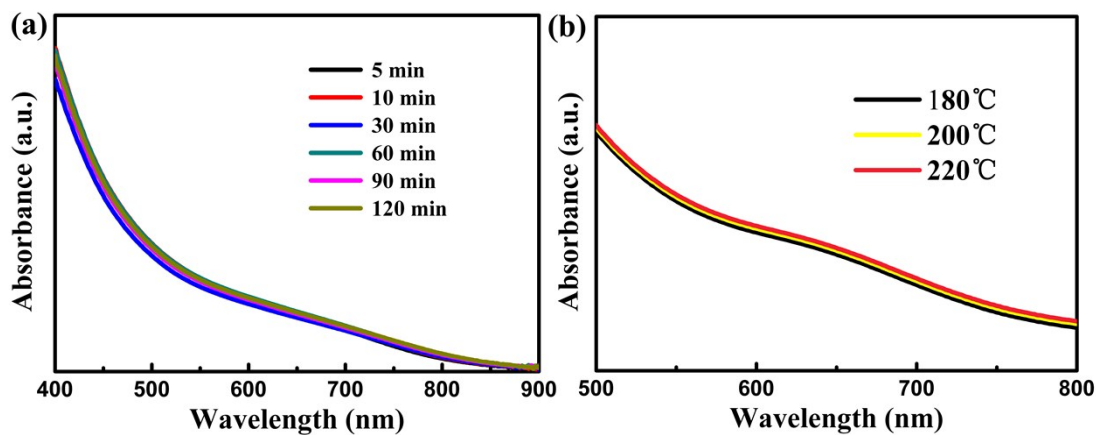

**Figure S3.** UV-vis absorbance of CISE QDs prepared with varying synthetic parameters. 0.75 mmol of CuI, 0.75 mmol of In(OAc)<sub>3</sub>, 1.5 mmol of Se, and 1.5 mL of DDT. (a) The

reaction time was adjusted from 5 min to 120 min. (b) The final reaction temperature was set at 180°C to 220°C.

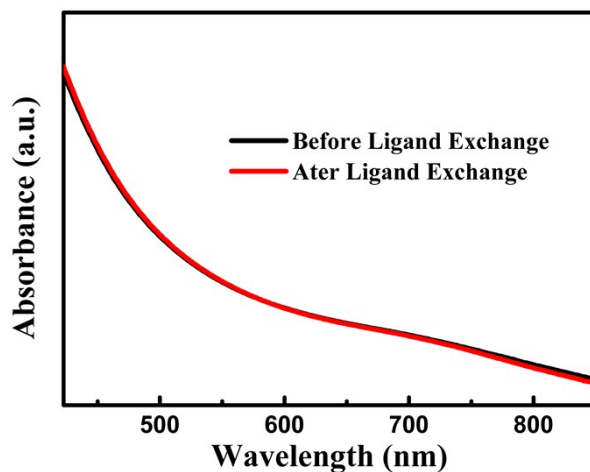

**Figure S4.** UV-vis absorbance of CISE QDs before and after MPA ligand exchange.

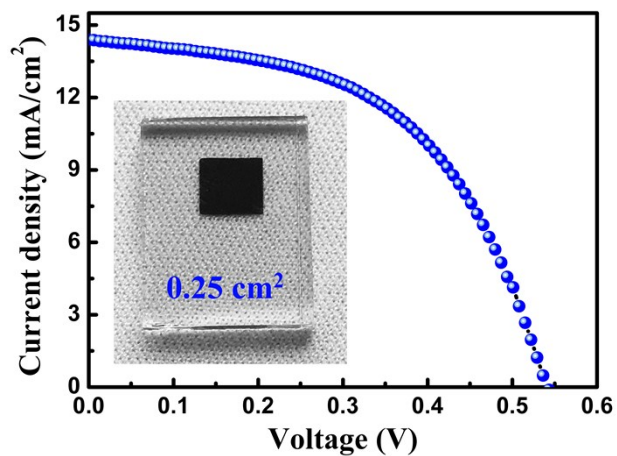

**Figure S5.** *J-V* curve of ~5 nm CISE QD-sensitized solar cells under simulated solar illumination at 100 mW cm<sup>-2</sup>.

(1) Liu, F.; Zhu, J.; Hu, L. H.; Zhang, B.; Yao, J. X.; Nazeeruddin, M. K.; Gratzel, M.; Dai, S. Y. *J. Mater. Chem. A* **2015**, *3*, 6315.
